# Supplementary material for: Synthesis and electro-optical properties of new conjugated hybrid polymers from EDOT end-capped dibenzothiophene and dibenzofuran
Source: Royal Society of Chemistry journal article supplement (doi:10.1039/c4nj01854k), 2014-12-08
Supplement: c4nj01854k1.pdf [file c4nj01854k1.pdf]

**Supporting Information** for *New Journal of Chemistry*:

**Synthesis and electro-optical properties of new conjugated  
hybrid polymers from EDOT end capped dibenzothiophene  
and dibenzofuran**

Kaiwen Lin, Shijie Zhen, Shouli Ming, Jingkun Xu\* and Baoyang Lu\*

*Jiangxi Key Laboratory of Organic Chemistry, Jiangxi Science and Technology*

*Normal University, Nanchang 330013, China*

\*: Corresponding authors. Tel: +86-791-88537967; Fax: +86-791-83823320.

Email: [xujingkun@tsinghua.org.cn](mailto:xujingkun@tsinghua.org.cn); [lby1258@163.com](mailto:lby1258@163.com).

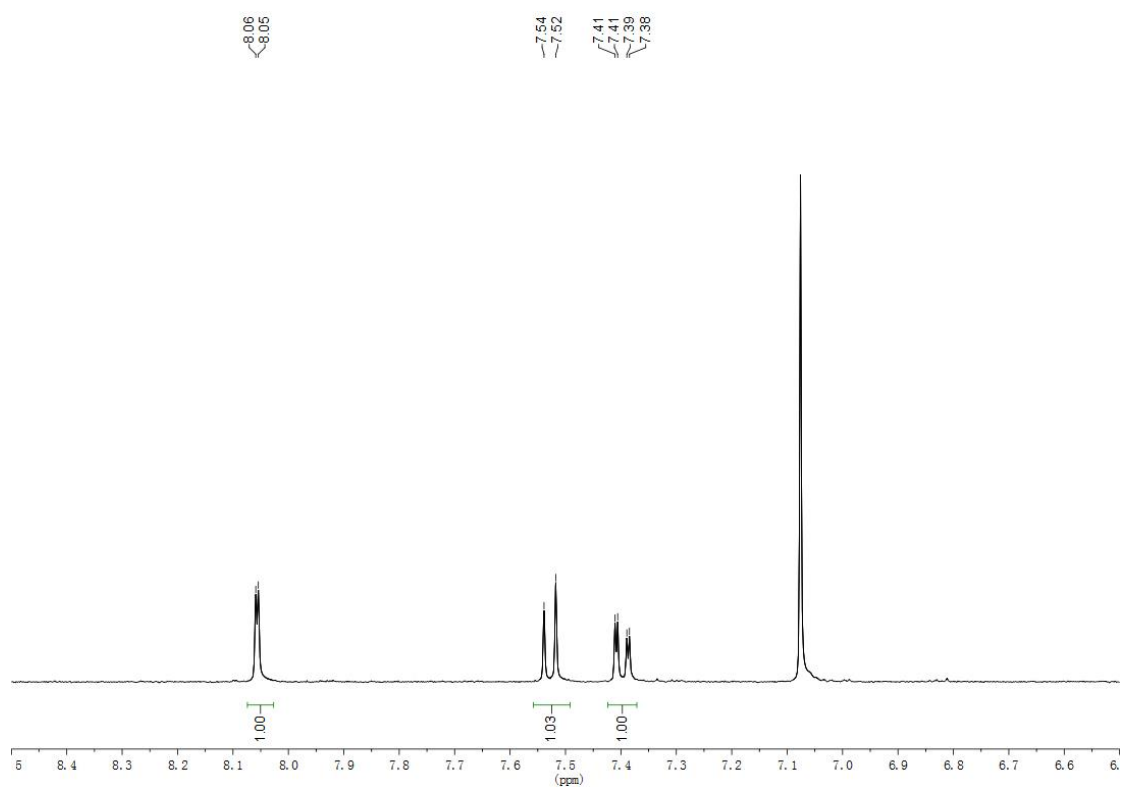

**Fig. S1**  $^1\text{H}$  NMR spectrum of 2,8-dibromodibenzothiophene.

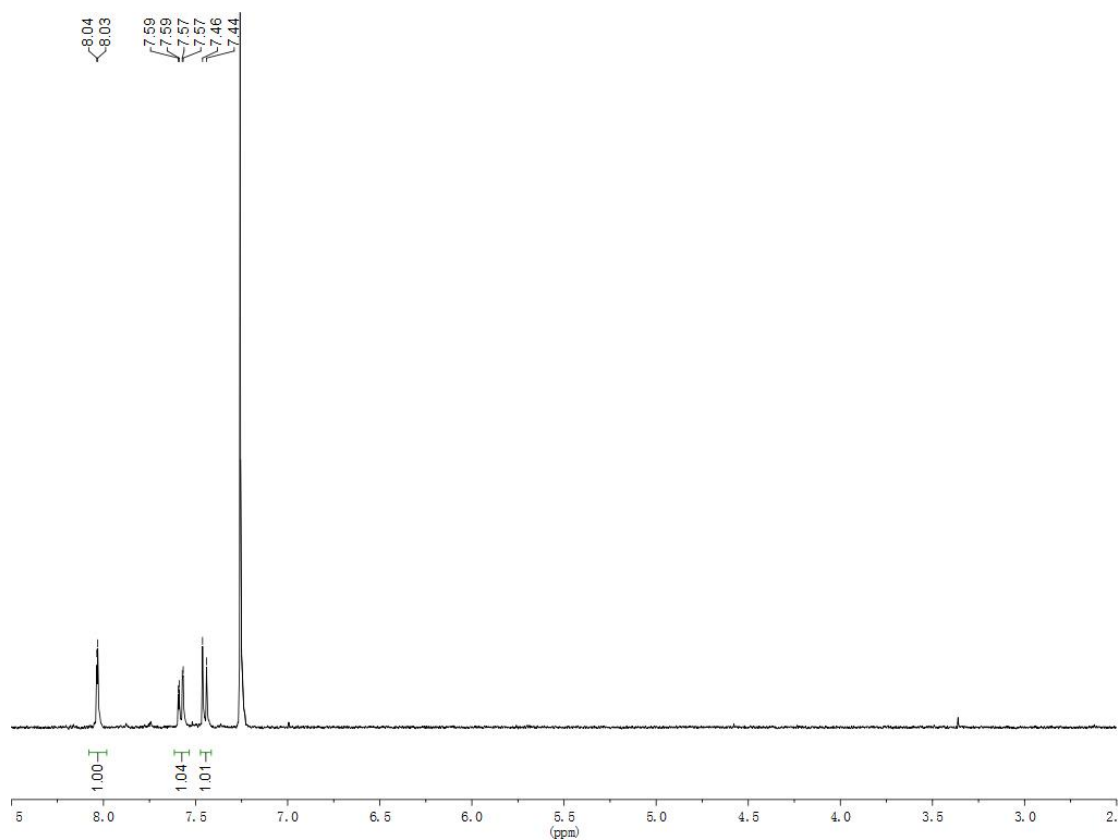

**Fig. S2**  $^1\text{H}$  NMR spectrum of 2,8-dibromodibenzofuran.

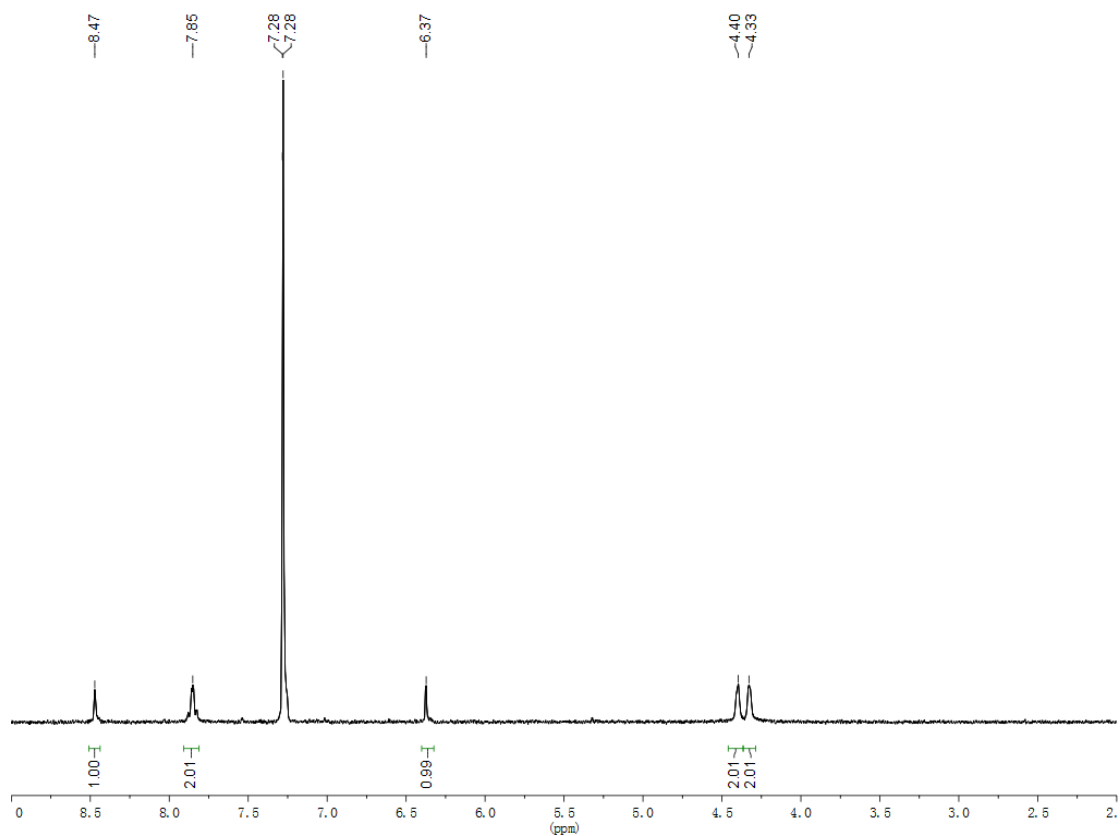

**Fig. S3**  $^1\text{H}$  NMR spectrum of DBT-EDOT.

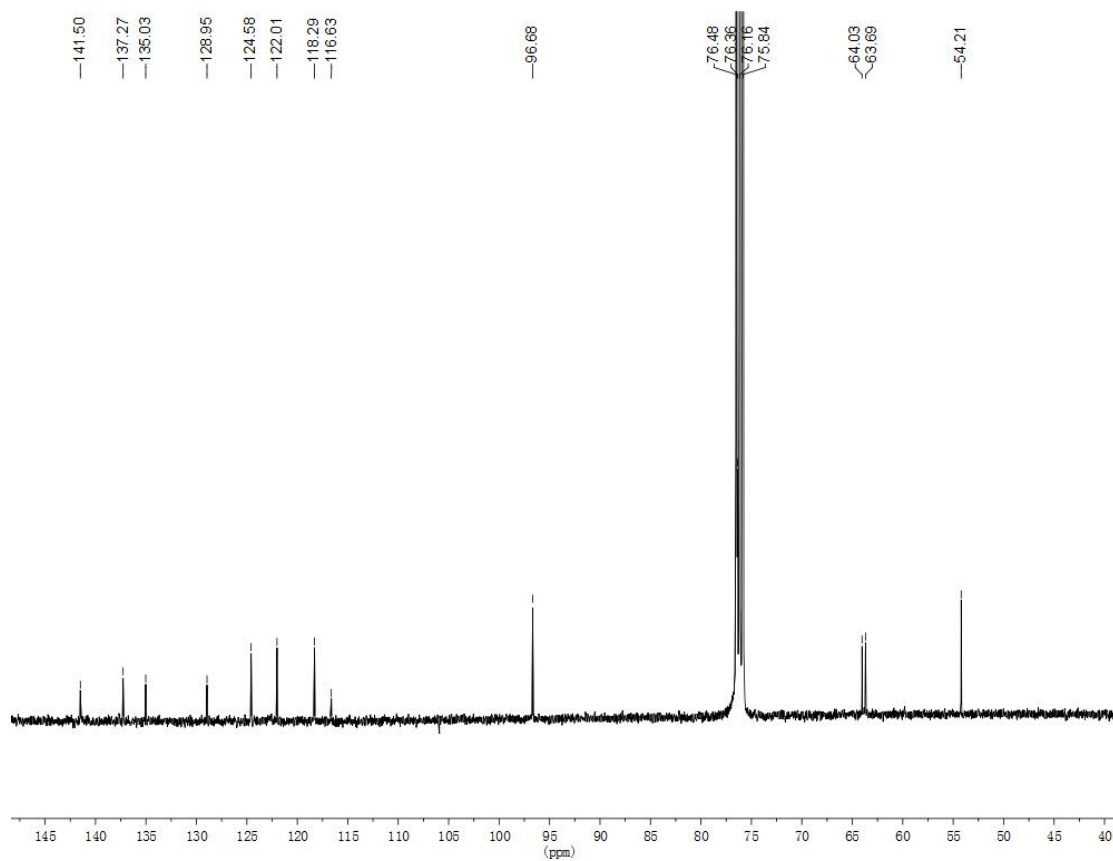

**Fig. S4**  $^{13}\text{C}$  NMR spectrum of DBT-EDOT.

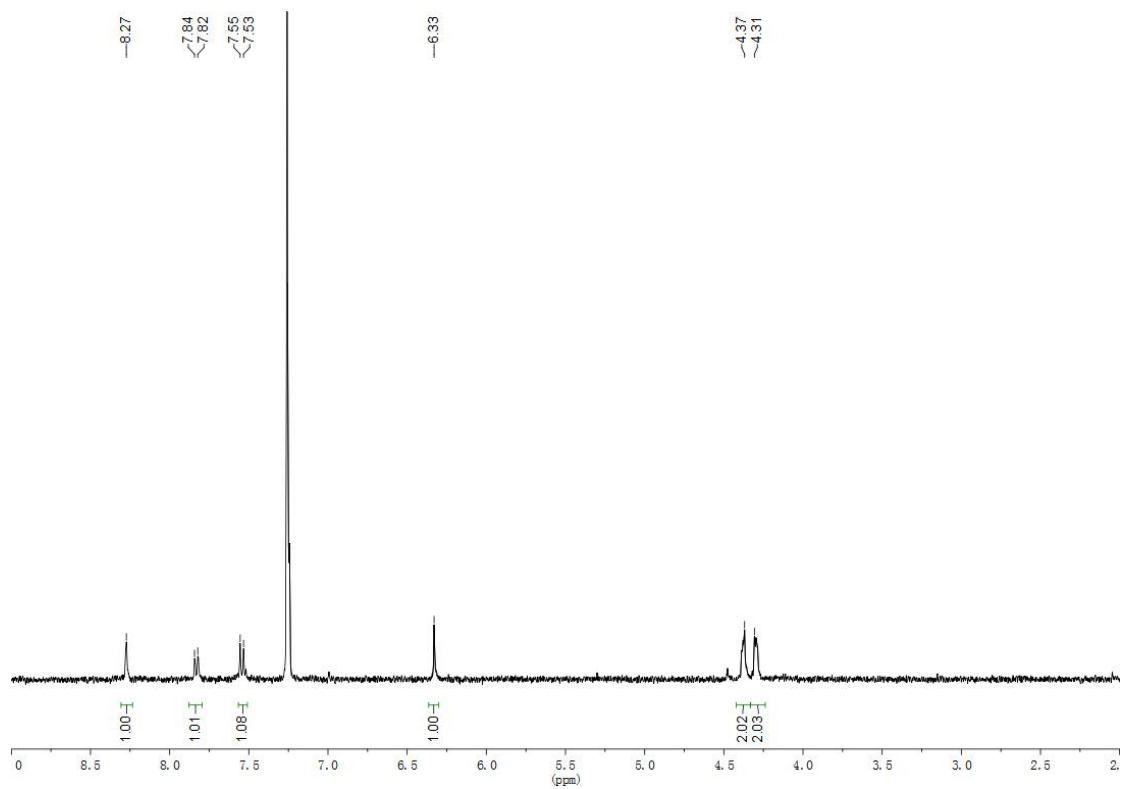

**Fig. S5**  $^1\text{H}$  NMR spectrum of DBF-EDOT.

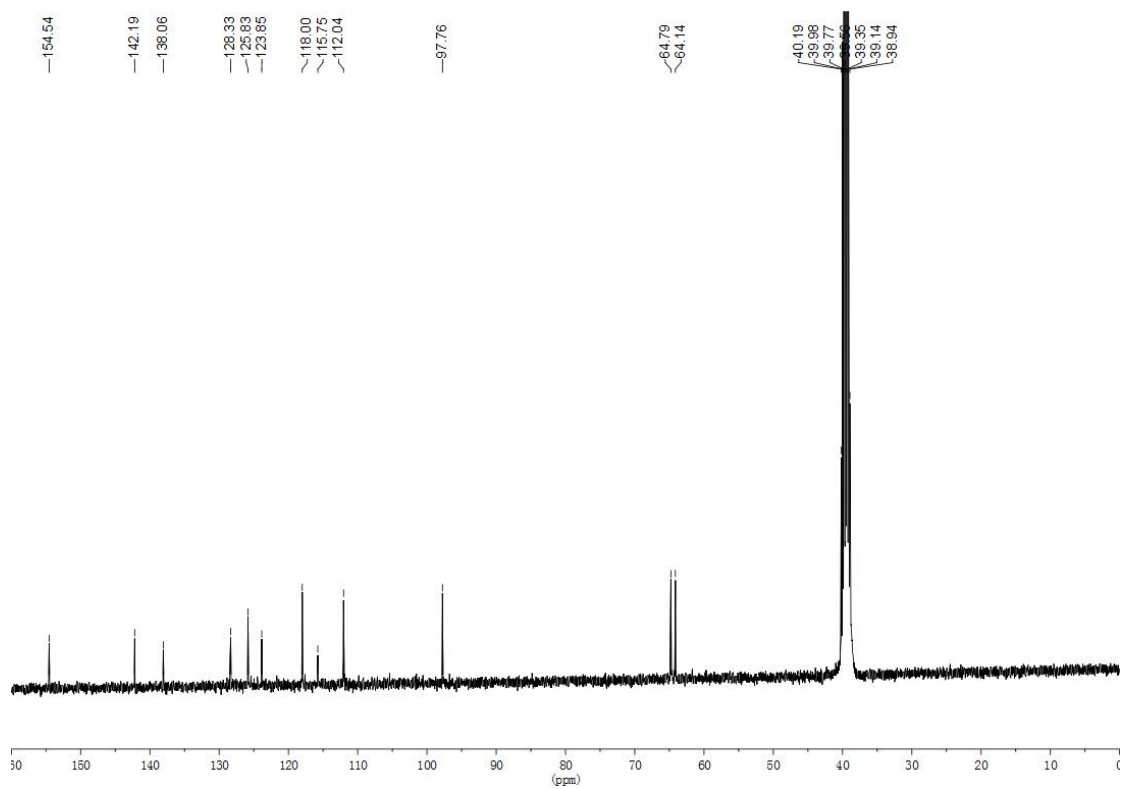

**Fig. S6**  $^{13}\text{C}$  NMR spectrum of DBF-EDOT.

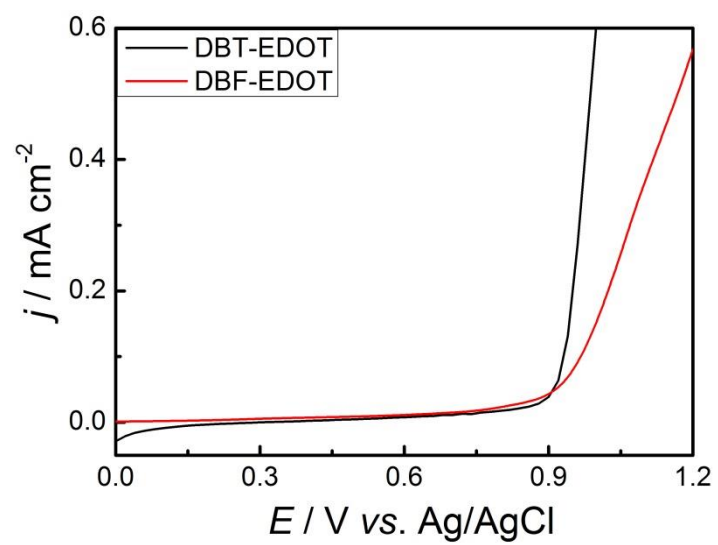

**Fig. S7** Anodic polarization curves of  $0.01 \text{ mol L}^{-1}$  DBT-EDOT and DBF-EDOT in  $\text{CH}_2\text{Cl}_2\text{-Bu}_4\text{NPF}_6$  ( $0.1 \text{ mol L}^{-1}$ ). Potential scan rate:  $50 \text{ mV s}^{-1}$ .



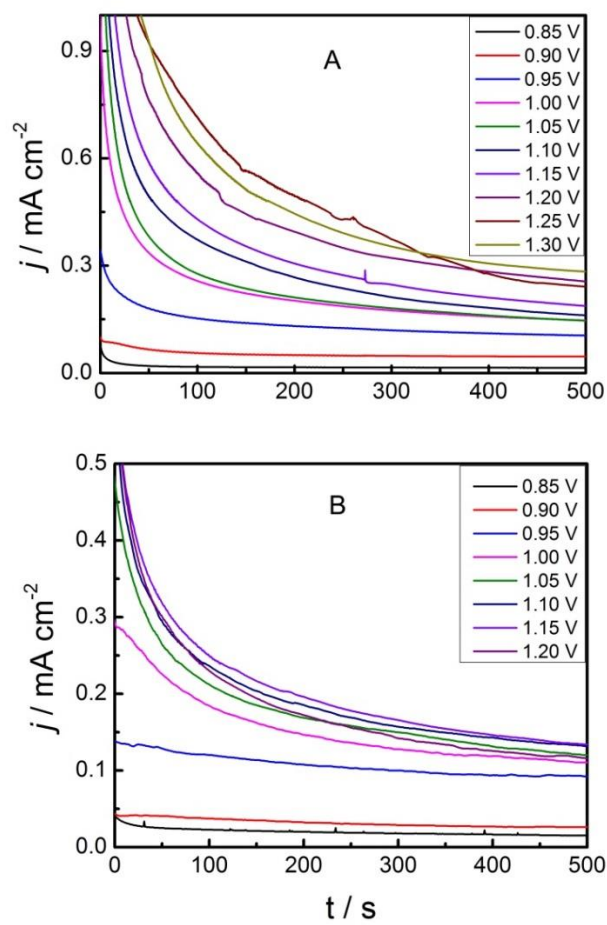

**Fig. S8** Chronoamperograms of  $0.01 \text{ mol L}^{-1}$  DBT-EDOT (A), and DBF-EDOT (B) in  $\text{CH}_2\text{Cl}_2\text{-Bu}_4\text{NPF}_6$  ( $0.1 \text{ mol L}^{-1}$ ) on Pt electrode at different applied potentials for 500 s.

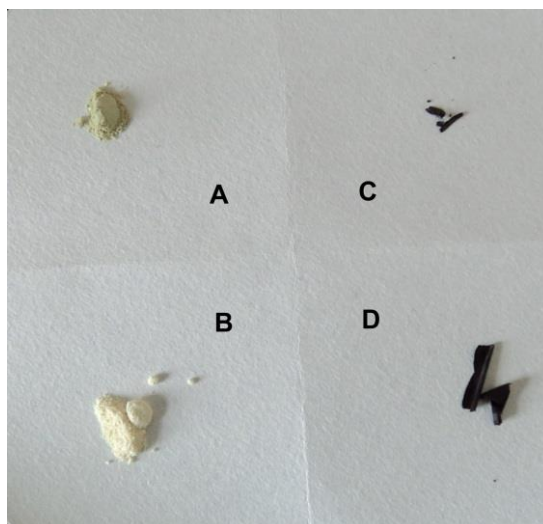

**Fig.S9** Samples of DBT-EDOT (A), DBF-EDOT (B), and corresponding polymers P(DBF-EDOT) (C), and P(DBT-EDOT) (D) by electropolymerization in  $\text{CH}_2\text{Cl}_2\text{-Bu}_4\text{NPF}_6$  ( $0.1 \text{ mol L}^{-1}$ ).

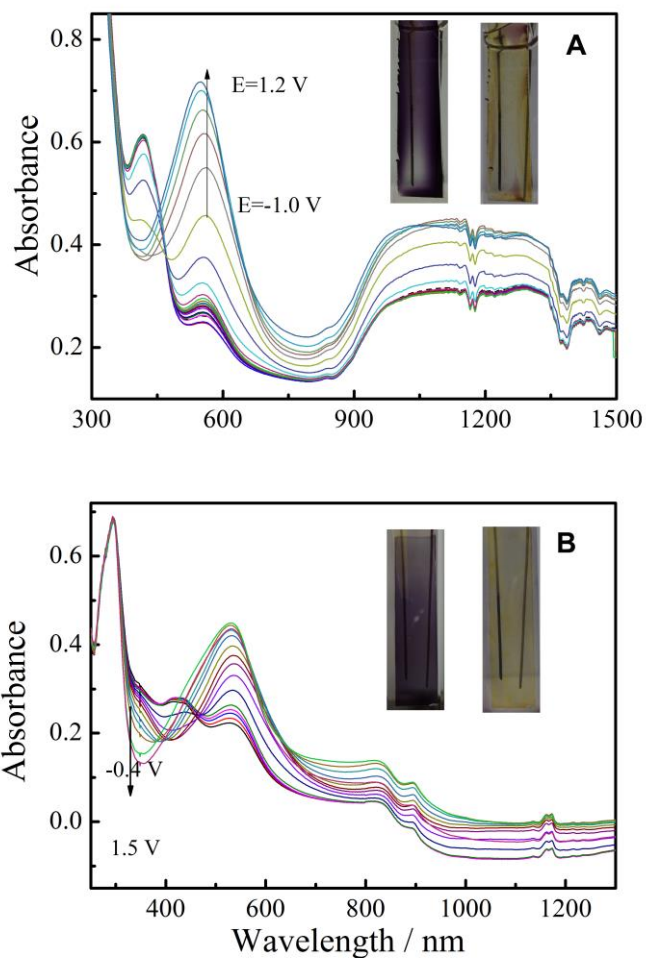

**Fig.S10** Spectroelectrochemistry for P(DBT-DEDOT) (A) on the ITO coated glass in  $\text{CH}_3\text{CN}-\text{Bu}_4\text{NPF}_6$  (0.1 mol L<sup>-1</sup>) between -1.0 V and 1.2 V ( $\Delta E = 0.1$  V). P(DBF-EDOT) (B) on the ITO coated glass in  $\text{CH}_3\text{CN}-\text{Bu}_4\text{NPF}_6$  (0.1 mol L<sup>-1</sup>) between -0.4 V and 1.5 V ( $\Delta E = 0.1$  V).
